# Supplementary material
Source: HighWire-hosted journal article supplement (https://erj.ersjournals.com/content/61/2/2202231)
Supplement: inline-supplementary-material-1 [file inline-supplementary-material-1.pdf]

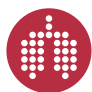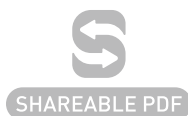

# The European Board of Accreditation in Pneumology (EBAP): reflections on 20 years promoting excellence in continuing medical education (CME) in respiratory medicine

Georgia Hardavella<sup>1</sup>, Mona Lichtblau <sup>2</sup>, Alf Henrik Andreassen<sup>3</sup>, Jamil Jubrail<sup>4</sup>, Edin Jusufovic<sup>5</sup>, Ortrud Karg<sup>6</sup>, Laurent Nicod<sup>7</sup>, Angelo Petroianni<sup>8</sup> and Paolo Palange<sup>9</sup>

<sup>1</sup>9th Department of Respiratory Medicine, 'Sotiria' Athens Chest Diseases Hospital, Athens, Greece. <sup>2</sup>Department of Respiratory Medicine, University Hospital of Zurich, Zurich, Switzerland. <sup>3</sup>Department of Research and Development, Haukeland University Hospital, Bergen, Norway. <sup>4</sup>Faculty of Sport, Health and Social Sciences, Solent University, Southampton, UK. <sup>5</sup>Department of Internal Medicine, Medical Faculty, University of Tuzla, UNTZ, Tuzla, Bosnia and Herzegovina. <sup>6</sup>Educational Affairs, German Respiratory Society, Berlin, Germany. <sup>7</sup>Service of Pneumology, CHUV, Lausanne, Switzerland. <sup>8</sup>Pulmonology Unit, Department of Public Health and Infectious Diseases, Policlinico Umberto I, Sapienza University of Rome, Rome, Italy. <sup>9</sup>Department of Public Health and Infectious Diseases Sapienza University of Roma, Rome, Italy.

Corresponding author: Georgia Hardavella ([georgiahardavella@hotmail.com](mailto:georgiahardavella@hotmail.com))

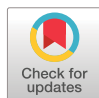

Shareable abstract (@ERSpublications)

**EBAP holds a central overarching position across Europe and overseas as an independent accreditor of training centres and educational activities with transferable and recognised CME/CPD points across countries** <https://bit.ly/3uZb5WT>

**Cite this article as:** Hardavella G, Lichtblau M, Andreassen AH, *et al.* The European Board of Accreditation in Pneumology (EBAP): reflections on 20 years promoting excellence in continuing medical education (CME) in respiratory medicine. *Eur Respir J* 2023; 61: 2202231 [DOI: 10.1183/13993003.02231-2022].

This single-page version can be shared freely online.

Copyright ©The authors 2023.  
For reproduction rights and  
permissions contact  
[permissions@ersnet.org](mailto:permissions@ersnet.org)

Received: 30 Nov 2022  
Accepted: 10 Dec 2022

Advances in respiratory medicine have presented a clear need for the continuous training and accreditation of health professionals, as well as of institutions providing and delivering care to respiratory patients.
